# Supplementary material
Source: PubMed Central journal article supplement (PMC8100900)
Supplement: jamacardiol-e210994-s001.pdf [file jamacardiol-e210994-s001.pdf]

## Supplementary Online Content

Chalazan B, Mol D, Darbar FA, et al. Association of rare genetic variants and early-onset atrial fibrillation in ethnic minority individuals. *JAMA Cardiol*. Published online May 5, 2021. doi:10.1001/jamacardio.2021.0994

**eTable 1.** Baseline Clinical Characteristics of African American, European American and Hispanic/Latinx Probands With Early-Onset Atrial Fibrillation (EOAF)

**eTable 2.** In-Silico Scores for Pathogenic or Likely Pathogenic Variants in African American and Hispanic/Latinx Probands With EOAF

**eTable 3.** In-Silico Scores for Co-Segregating Variants of Unknown Significance in African American and Hispanic/Latinx Probands With EOAF

This supplementary material has been provided by the authors to give readers additional information about their work.

**eTable 1.** Baseline clinical characteristics of African American, European American and Hispanic/Latinx probands with early-onset atrial fibrillation (EOAF).

| Category                             | European American (n=132) | African American (n=147) | Hispanic/Latinx (n=77) | P-value |
|--------------------------------------|---------------------------|--------------------------|------------------------|---------|
| Gender (male)                        | 100 (75.8%)               | 82 (55.8%)               | 48 (62.3%)             | .002    |
| Age of onset                         | 58.0 (52.0-62.0)          | 55.0 (46.0-59.0)         | 51.5 (44.0-59.0)       | <.0001  |
| Paroxysmal AF                        | 105 (79.6%)               | 118 (80.3%)              | 54 (70.1%)             | .18     |
| Persistent AF                        | 19 (14.4%)                | 21 (14.3%)               | 15 (19.5%)             | .54     |
| Permanent AF                         | 8 (6.1%)                  | 8 (5.4%)                 | 8 (10.4%)              | .35     |
| Family history                       | 43 (32.6%)                | 13 (8.8%)                | 11 (14.3%)             | <.0001  |
| Body mass index (kg/m <sup>2</sup> ) | 31.5 (27.8-37.8)          | 33.3 (28.4-41.0)         | 30.1 (26.4-36.0)       | .01     |
| Obstructive sleep apnea              | 9 (6.8%)                  | 14 (9.5%)                | 7 (9.1%)               | .70     |
| Hyperthyroidism                      | 1 (0.8%)                  | 1 (0.7%)                 | 1 (1.3%)               | .64     |
| Coronary artery disease              | 16 (12.1%)                | 16 (10.9%)               | 12 (15.6%)             | .59     |
| Valve heart disease                  | 2 (1.5%)                  | 7 (4.8%)                 | 12 (15.6%)             | <.0001  |
| Congestive heart failure             | 22 (16.7%)                | 45 (30.6%)               | 13 (16.9%)             | .009    |
| Hypertension                         | 76 (57.6%)                | 87 (59.2%)               | 23 (29.9%)             | <.0001  |
| Type II diabetes                     | 24 (18.2%)                | 42 (28.6%)               | 12 (15.6%)             | .04     |
| Stroke                               | 7 (5.3%)                  | 9 (6.1%)                 | 6 (7.8%)               | .77     |
| Vascular disease                     | 3 (2.3%)                  | 5 (3.4%)                 | 3 (3.9%)               | .79     |

AA, African American; H/L, Hispanic/Latinx; CHADS<sub>2</sub>-VASC, Congestive Heart Failure, Hypertension, Age, Diabetes, Stroke, Vascular Disease and Sex.

**eTable 2.** In-silico scores for pathogenic or likely pathogenic variants in African American and Hispanic/Latinx probands with EOAF.

| STUDY ID | Ethnicity | Gene           | GERP++ RS Score | SIFT Score | Polyphen2 HDIV Score | Polyphen2 HVAR Score | PROVEAN Score | MutationTasterScore | CADD Score |
|----------|-----------|----------------|-----------------|------------|----------------------|----------------------|---------------|---------------------|------------|
| UIC-     | H/L       | <i>TTN</i>     | 5.81            | -          | -                    | -                    | -             | 1.00                | 69.00      |
| UIC-     | AA        | <i>PITX2</i>   | 5.37            | 0.00       | 0.99                 | 0.98                 | -6.59         | 1.00                | 34.00      |
| UIC-     | H/L       | <i>TTN</i>     | 4.54            | -          | -                    | -                    | -             | 1.00                | 36.00      |
| UIC-     | H/L       | <i>CACNA1C</i> | -               | -          | -                    | -                    | -             | -                   | 23.90      |
| UIC-     | AA        | <i>TTN</i>     | 6.07            | -          | -                    | -                    | -             | 1.00                | 63.00      |
| UIC-     | AA        | <i>SCN5A</i>   | 3.29            | -          | -                    | -                    | -             | 1.00                | 37.00      |
| UIC-     | H/L       | <i>TTN</i>     | -               | -          | -                    | -                    | -             | 1.00                | 23.60      |
| UIC-     | AA        | <i>TTN</i>     | 4.54            | -          | -                    | -                    | -             | 1.00                | 36.00      |
| UIC-     | AA        | <i>TTN</i>     | 5.56            | -          | -                    | -                    | -             | 1.00                | 71.00      |
| UIC-     | AA        | <i>PITX2</i>   | 5.37            | 0.00       | 1.00                 | 0.98                 | -2.83         | 1.00                | 33.00      |
| UIC-     | AA        | <i>KCNQ1</i>   | 6.10            | 0.00       | 1.00                 | 1.00                 | -5.87         | 1.00                | 23.30      |
| UIC-     | AA        | <i>PITX2</i>   | 4.63            | 0.00       | 1.00                 | 0.98                 | -4.22         | 1.00                | 27.20      |
| VA-      | AA        | <i>TTN</i>     | 5.55            | -          | -                    | -                    | -             | 1.00                | 73.00      |
| VA-      | AA        | <i>SCN5A</i>   | 4.30            | 0.00       | 1.00                 | 0.99                 | -5.85         | 1.00                | 31.00      |
| VA-      | AA        | <i>TTN</i>     | -               | -          | -                    | -                    | -             | 1.00                | 23.60      |

AA, African American; H/L, Hispanic/Latinx; GERP, Genomic Evolutionary Rate Profiling (Rejected Substitution); SIFT, Sorting Intolerant From Tolerant; PolyPhen2, Polymorphism Phenotyping (Version 2); PROVEAN, Protein Variation Effect Analyzer; CADD, Combined Annotation Dependent Depletion.

**eTable 3.** In-Silico scores for co-segregating variants of unknown significance in African American and Hispanic/Latinx probands with EOAF.

| Ethnicity | Gene         | GERP++ RS Score | SIFT Score | Polyphen2 HDIV Score | Polyphen2 HVAR Score | PROVEAN Score | MutationTaster Score | CADD Score |
|-----------|--------------|-----------------|------------|----------------------|----------------------|---------------|----------------------|------------|
| AA        | <i>KCNE5</i> | 4.80            | 0.00       | 1.00                 | 1.00                 | -4.58         | 0.99                 | 29.10      |
| AA        | <i>SCN10</i> | 3.30            | 0.00       | 1.00                 | 1.00                 | -7.75         | 1.00                 | 29.10      |
| H/L       | <i>TTN</i>   | 5.93            | 0.00       | 1.00                 | 1.00                 | -6.88         | 1.00                 | 24.10      |
| H/L       | <i>NPPA</i>  | 5.84            | 0.00       | 1.00                 | 0.97                 | -6.40         | 0.99                 | 26.20      |
| AA        | <i>MYH6</i>  | 4.63            | 0.00       | 1.00                 | 1.00                 | -4.96         | 1.00                 | 32.00      |
| H/L       | <i>MYH6</i>  | 4.63            | 0.00       | 1.00                 | 1.00                 | -4.32         | 1.00                 | 28.40      |

AA, African American; H/L, Hispanic/Latinx; GERP, Genomic Evolutionary Rate Profiling (Rejected Substitution); SIFT, Sorting Intolerant From Tolerant; PolyPhen2, Polymorphism Phenotyping (Version 2); PROVEAN, Protein Variation Effect Analyzer; CADD, Combined Annotation Dependent Depletion.
